# Supplementary material for: Evaluation of nanoparticle albumin-bound paclitaxel loaded macrophages for glioblastoma treatment based on a microfluidic chip
Source: Frontiers journal article supplement (doi:10.3389/fbioe.2024.1361682), 2024-03-18
Supplement: Data_Sheet_1.PDF [file Data_Sheet_1.PDF]

## Supplementary Material

### 1 Supplementary Figures

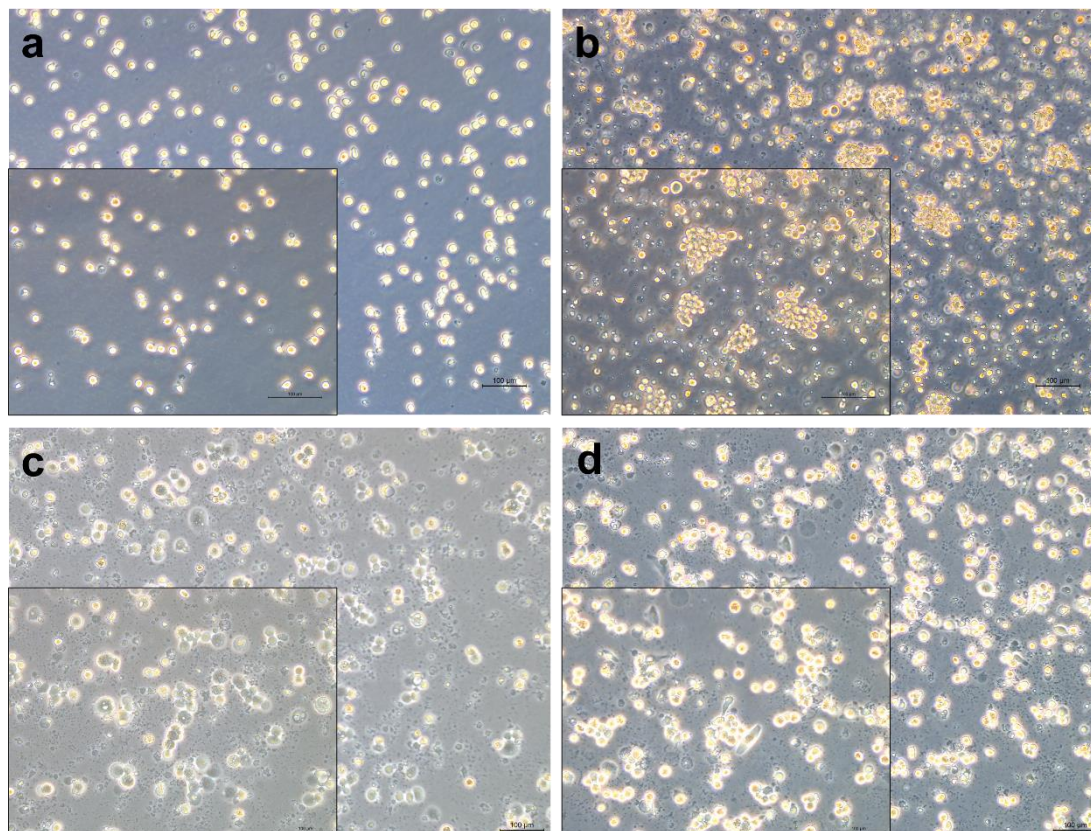

**Supplementary Figure 1.** (a) U937 cells. (b) U937 cells were treated with PMA for 24 h and differentiated into macrophages. (c) U937 cells differentiated macrophages were treated with LPS. (d) U937 cells differentiated macrophages were treated with nab-PTX.

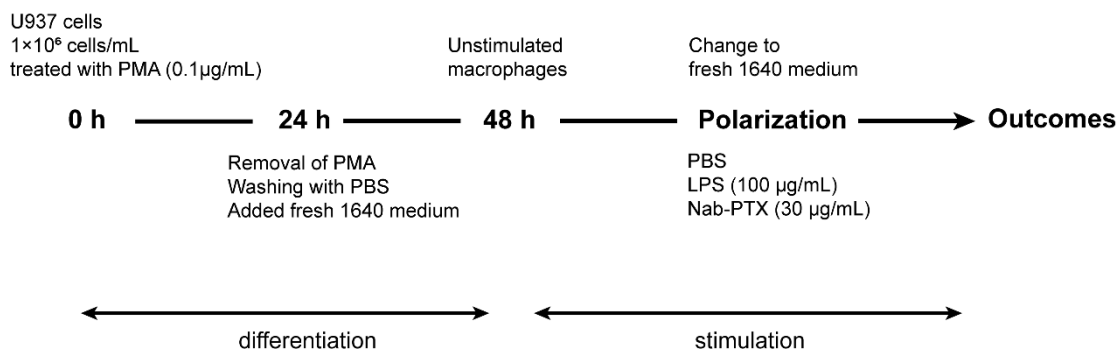

**Supplementary Figure 2.** Timeline of the experimental protocol used for PMA-induced macrophage differentiation and subsequent polarization in M1 conditions.
